# Supplementary material for: Intestinal alkaline phosphatase deficiency increases the risk of diabetes
Source: PubMed Central journal article supplement — BMJ Open Diabetes Res Care. 2022 Jan 26;10(1):e002643. doi: 10.1136/bmjdrc-2021-002643 (PMC8796214; doi:10.1136/bmjdrc-2021-002643), 2022-01-26
Supplement: bmjdrc-2021-002643supp001.pdf [file bmjdrc-2021-002643supp001.pdf]

Malo et al., 2021

IAPD increases the risk of diabetes

## SUPPLEMENTARY MATERIALS

## Intestinal alkaline phosphatase deficiency increases the risk of diabetes

**Jagannath Malo, Dip Med Tech<sup>1</sup>, Md. Jahangir Alam, PhD<sup>2</sup>, Salequl Islam, PhD<sup>3</sup>,  
Md. Abdul Mottalib, PhD<sup>4</sup>, Md. Mehedi Hasan Rocki, Dip Med Tech<sup>1</sup>,  
Ginok Barmon, Dip Med Tech<sup>1</sup>, Shamema Akter Tinni, Dip Med Tech<sup>1</sup>,  
Swapan K. Barman, BSc<sup>1</sup>, Tapas Sarker, MBA<sup>1</sup>, Md. Nayeemul Islam Khan, MSc<sup>4</sup>,  
Kanakaraju Kaliannan, MD<sup>5</sup>, Muhammad A Hasanat, MBBS, MD<sup>6</sup>,  
Salimur Rahman, MBBS, FRCP<sup>7</sup>, Md. Faruque Pathan, MBBS, MD<sup>8</sup>,  
AK Azad Khan, MBBS, DPhil<sup>1</sup>, Madhu S. Malo, MBBS, PhD<sup>1,4,9\*</sup>**

<sup>1</sup>Diabetic Association of Bangladesh, Dhaka, Bangladesh

<sup>2</sup>Department of Statistics, University of Rajshahi, Rajshahi, Bangladesh

<sup>3</sup>Department of Microbiology, Jahangirnagar University, Savar, Bangladesh

<sup>4</sup>Department of Biochemistry and Molecular Biology, BIRDEM, Dhaka, Bangladesh

<sup>5</sup>Department of Medicine, Massachusetts General Hospital, Harvard University, Cambridge, Massachusetts, USA

<sup>6</sup>Department of Endocrinology, Bangabandhu Sheikh Mujib Medical University, Dhaka, Bangladesh

<sup>7</sup>Department of Hepatology, Bangabandhu Sheikh Mujib Medical University, Dhaka, Bangladesh

<sup>8</sup>Department of Endocrinology, BIRDEM, Dhaka, Bangladesh

<sup>9</sup>Centre for Global Health Research, Diabetic Association of Bangladesh, Dhaka, Bangladesh

**Short Title:** IAPD increases the risk of diabetes

Malo et al., 2021

IAPD increases the risk of diabetes

**\*For correspondence:**

Madhu S. Malo, MBBS, PhD.

Adviser, Diabetic Association of Bangladesh

Professor, Department of Biochemistry and Molecular Biology, BIRDEM, Dhaka, Bangladesh

BIRDEM (1st Floor), Room No. 240

122 Kazi Nazrul Islam Avenue

Shahbagh, Dhaka-1000, Bangladesh

Mobile: +880-171-002-3456

E-mail: [madhumalo@hotmail.com](mailto:madhumalo@hotmail.com)

**Approval of the Study:** The National Research Ethics Committee (NREC) of Bangladesh Medical Research Council (BMRC), Government of the People's Republic of Bangladesh (Dhaka, Bangladesh) reviewed and approved the study (BMRC Registration Number:150 02 10 2018; Ref.: BMRC/NREC/2016-2019/28). Each participant consented to participate in the study and signed an informed consent form approved by the NREC.

**Funding:** The study was supported by grants (to MSM) from the Ministry of Education, Government of the People's Republic of Bangladesh (Dhaka, Bangladesh; Grant No. LS2019937) and Bangladesh Medical Research Council (Dhaka, Bangladesh; Grant No. BMRC/HPNSP-Grant/2019-2020/569(1-60)).

**Keywords:** Fasting plasma glucose; Hyperglycemia; Hypertension; Incipient diabetes; Obesity; The metabolic syndrome; Type 2 diabetes mellitus.

**Abbreviations:** AP, alkaline phosphatase; BMI, body mass index; FPG, fasting plasma glucose; IAP, intestinal alkaline phosphatase; LPS, lipopolysaccharides; LTA, lipoteichoic acids; T1DM, type 1 diabetes mellitus; T2DM, type 2 diabetes mellitus.

Malo et al., 2021

IAPD increases the risk of diabetes

## TABLE OF CONTENTS

|                                                                            |         |
|----------------------------------------------------------------------------|---------|
| 1. Appendix A: Supplementary Statistics on Diabetes -----                  | Page 4  |
| 2. Appendix B: Supplementary Data on Intestinal Alkaline Phosphatase ----- | Page 5  |
| 3. Appendix C: Supplementary Methods -----                                 | Page 7  |
| 4. Supplementary Figure S1 -----                                           | Page 11 |
| 5. Supplementary Table S1 -----                                            | Page 12 |
| 6. Supplementary Table S2 -----                                            | Page 13 |
| 7. Supplementary Table S3 -----                                            | Page 14 |
| 8. Supplementary Table S4 -----                                            | Page 15 |
| 9. Supplementary Table S5 -----                                            | Page 16 |
| 10. Supplementary Table S6 -----                                           | Page 17 |
| 11. References -----                                                       | Page 18 |

Malo et al., 2021

IAPD increases the risk of diabetes

## Appendix A

### SUPPLEMENTARY STATISTICS ON DIABETES

(Refs: 1-9)

#### PREVALENCE

- ❖ Global number of people having diabetes in 2019: Approx. 463 million (9.3% of world adult population)
- ❖ Global number of people projected to have diabetes in 2030: Approx. 578 million (10.2% of world adult population)
- ❖ Global number of people projected to have diabetes in 2045: Approx. 700 million (10.8% of world adult population)
- ❖ Number of people in the USA having diabetes in 2018: Approx. 34.2 million (9.8% of total adult population)

#### DEATH

- ❖ Global death directly from diabetes in 2016: Approx. 1.6 million
- ❖ Global death associated with hyperglycemia in 2012: Approx. 2.3 million
- ❖ U.S. death from diabetes in 2017: Approx. 270,700

#### HEALTH EXPENDITURE

- ❖ Global health expenditure on T2DM in 2017: Approx. \$727 billion US dollars
- ❖ U.S. health expenditure on T2DM in 2017: Approx. \$327 billion US dollars
- ❖ U.S. health expenditure on T2DM projected in 2030: Approx. \$622 billion US dollars

Malo et al., 2021

IAPD increases the risk of diabetes

## Appendix B

### INTESTINAL ALKALINE PHOSPHATASE

#### GENE

- ❖ Human: ALPI alkaline phosphatase, intestinal [Homo sapiens (human)] (synonymous to intestinal alkaline phosphatase, IAP)
- ❖ Gene ID: 248 (<https://www.ncbi.nlm.nih.gov/gene/248>)
- ❖ Location: Chromosome 2q37.1
- ❖ mRNA: 2259 bases                      CDS: 31-1617 (GenBank: BC132678.1)
- ❖ Protein: 528 aa (<https://www.ncbi.nlm.nih.gov/nucore/BC132678.1>)

#### FUNCTION

IAP is exclusively expressed in the villus-associated enterocytes of small intestine and hence known as enterocyte differentiation marker. The enzyme is bidirectionally secreted into intestinal lumen as well as systemic circulation.<sup>10</sup> The luminal IAP travels downwards from the proximal small intestine to the distal large intestine and then excreted with stool.<sup>11</sup>

The physiological and pharmacological properties of IAP have been extensively reviewed.<sup>12-16</sup> Physiologically, IAP exerts an anti-inflammatory effects by detoxifying various bacterial toxins, such as lipopolysaccharides (LPS), lipoteichoic acid (LTA), CpG DNA, flagellin and uridine diphosphate (UDP), and IAP inactivates these targets by dephosphorylation (phosphohydrolysis).<sup>17-21</sup> Also, IAP maintains the normal homeostasis of intestinal microbiota and promotes the gut bacterial growth by reducing the concentrations of intestinal luminal

Malo et al., 2021

IAPD increases the risk of diabetes

nucleotide triphosphates (ATP, etc.) that have toxic effect on bacterial growth.<sup>22</sup> Further, IAP maintains the gut mucosal integrity, regulates intestinal luminal pH, and limits fat absorption .<sup>23-25</sup>

Pharmacologically, in different animal and human models IAP has been used to treat the metabolic syndrome, enterocolitis, inflammatory bowel disease, peritonitis, acute kidney injury, enteropathogenic infections and ageing.<sup>7,11,26-34</sup>

Malo et al., 2021

IAPD increases the risk of diabetes

## Appendix C

### SUPPLEMENTARY METHODS

#### STUDY POPULATION

In 2015, we conducted a case-control study (Case: Diabetes patients, Control: Healthy participants (no diabetes)), which established that intestinal alkaline phosphatase (IAP) deficiency is directly associated with T2DM.<sup>7</sup> When the average IAP level was 65 U/g stool in healthy people, it was 35 U/g stool in T2DM patients. In the context of defining a causative role of IAPD in the development of T2DM, we followed-up the health status of 671 participants of the control group for almost 5 years, wherein the baseline physical and biochemical profiles, including body mass index (BMI), fasting plasma glucose (FPG) and IAP values, lipid profile, of each individual participant was known. The follow-up data (second visit) were not available for 97 participants (19 males, 78 females; excluded group) because of migration, pregnancy, refusal, death, etc. Accordingly, the current prospective cohort study included 574 participants (168 males and 406 females). The participants, 30 to 60 years old, were stratified into two groups based on baseline IAP levels (Low IAP Group (IAPD Group): <65.0 U/g stool; High IAP Group (No IAPD Group):  $\geq$ 65.0 U/g stool). Because of easy accessibility, the original case-control study included more females than males, and as a consequence, the number of females is also higher in this current prospective study. A participant was diagnosed as having diabetes when the FPG level was  $\geq$ 7.0 mmol/l (126 mg/dl) or HbA1c level  $\geq$ 6.5%.<sup>1</sup> All participants were on unrestricted diets, and had no history of chronic alcohol consumption.

Malo et al., 2021

IAPD increases the risk of diabetes

The National Research Ethics Committee (NREC) of Bangladesh Medical Research Council (BMRC), Government of the People's Republic of Bangladesh (Dhaka, Bangladesh) reviewed and approved the study (BMRC Registration Number:150 02 10 2018; Ref.: BMRC/NREC/2016-2019/28). Each participant consented to participate in the study and signed an informed consent form approved by the NREC.

### LABORATORY PROCEDURES

The procedures for physical examination, socio-medical history and biochemical tests have been previously described.<sup>7</sup> Physical examination of a participant included measuring height, weight and blood pressure. Body mass index (BMI) was calculated as weight in kg divided by the square of height in meter ( $\text{kg}/\text{m}^2$ ). Each participant was inquired for the history of diabetes, heart, kidney and liver diseases, and also alcohol consumption. Laboratory tests were completed using biochemical assay reagents from Linear Chemicals S.L. (Barcelona, Spain) and an automatic biochemistry analyzer from Sinnowa Medical Science & Technology Co., Ltd. (Nanjing, Jiangsu, China; Model: Sinnolab MT 5000, Version 5.00). The diabetes status of each participant was confirmed by measuring fasting (at least 10 hours) plasma glucose (FPG) concentration. An FPG level of  $\geq 7.0$  mmol/l (126 mg/dl) or HbA1c level  $\geq 6.5\%$  was considered diagnostic for diabetes.<sup>1</sup> Each participant was also subjected to serum biochemical tests for cholesterol, low-density lipoproteins (LDL), high-density lipoprotein (HDL), triglycerides, creatinine and alanine aminotransferase (ALT) as previously described.<sup>7</sup>



Malo et al., 2021

IAPD increases the risk of diabetes

**STOOL ALKALINE PHOSPHATASE (STAP) ASSAY**

Alkaline phosphatase (AP) assay was performed on the supernatant of a homogenized stool suspension as previously described.<sup>7</sup> In brief, 100 mg of fresh stool was suspended in 5 ml of ‘stool dilution buffer’ (10 mM Tris-HCl, pH 8.0, 1 mM magnesium chloride, 10 µM zinc chloride) and homogenized by rigorous vortexing. The stool suspension was then centrifuged at 10,000 x g for 20 min, and the supernatant containing AP was collected and used for measuring AP concentration. AP in the stool supernatant was measured using the automatic biochemistry analyzer mentioned above (Nanjing, Jiangsu, China). Briefly, 20 µl of stool supernatant was mixed with 1 ml of AP assay buffer (1.25 M diethanolamine (DEA) buffer, pH 10.2, 0.6 mM magnesium chloride) containing 10 mM p-nitrophenylphosphate (pNPP). The reaction mixture was incubated for one min at 37°C, and then AP concentration was measured by the analyzer pre-calibrated with AP standards. Because approx. 80% of the AP activity in stool is due to IAP, the stool AP (STAP) values are expressed as units of IAP per gram stool as previously defined.<sup>7</sup> AP assays were performed by laboratory technologists who were blinded to the diagnoses of participants.

**STATISTICAL ANALYSIS**

Statistical analysis was performed using the SAS 9.4 software (SAS Institute, Inc., Cary, North Carolina). Mean and standard deviation were determined for controls and T2DM cases stratified by gender. Depending on the normality of the data, unpaired two-tailed Student’s *t*-test or Wilcoxon-Mann-Whitney U test was used to examine the statistical significance of difference between two groups (control and T2DM). The correlation between IAP and various risk factors for T2DM was evaluated by Pearson’s correlation coefficients stratified by gender and T2DM

Malo et al., 2021

IAPD increases the risk of diabetes

status (T2DM patients or non-T2DM controls). Adjusted mean difference in IAP level between T2DM cases and non-T2DM controls was calculated by generalized linear model (GLM) of regression analysis controlling for the effects of sex, age, BMI, creatinine, Cholesterol, HDL, LDL, TG, ALT, SBP and DBP. The statistical significance of the variance associated with independent variables were determined from sum of square III using GLM procedure in SAS. Chi-square test was used to examine the association between the IAPD group and T2DM status. Log-binomial regression analysis was conducted using PROC GENMOD procedure in SAS to calculate the unadjusted and adjusted risk ratios (RR). The independent risk contribution of IAP to T2DM status was evaluated based on the adjusted RR. We performed repeated measure ANOVA (i.e., repeated measure generalized linear regression analysis) to examine the association of the IAP level with T2DM adjusted for other independent variables. A  $p$  value of  $<0.05$  was considered statistically significant for all statistical tests. An online program was used to perform post-hoc statistical power analysis of two independent groups (<http://clincalc.com/Stats/Power.aspx>).

Malo et al., 2021

IAPD increases the risk of diabetes

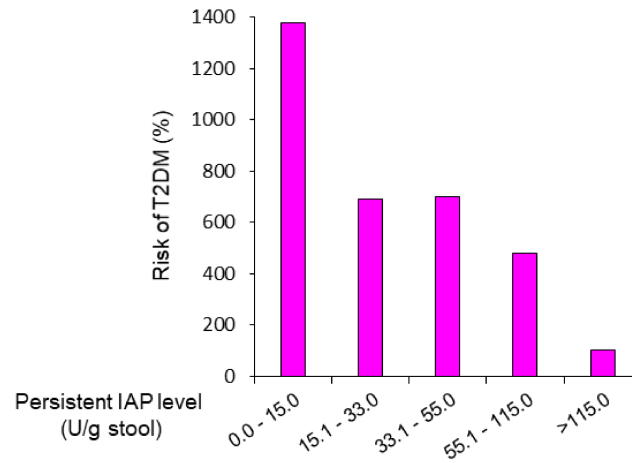

**Fig. S1.** A 5-year prospective cohort study shows that persistent intestinal alkaline phosphatase deficiency (IAPD) increases the risk of developing type 2 diabetes mellitus (T2DM). **Note:** The lower the persistent IAPD the higher the risk of T2DM.

Malo et al., 2021

IAPD increases the risk of diabetes

**Table S1. The participants included in or excluded from the study have similar physical and biochemical characteristics.**

| Characteristic                  | Total participants         |                            | Males                      |                            | Females                    |                            |
|---------------------------------|----------------------------|----------------------------|----------------------------|----------------------------|----------------------------|----------------------------|
|                                 | Included                   | Excluded                   | Included                   | Excluded                   | Included                   | Excluded                   |
| No. of participants             | 574                        | 97                         | 168                        | 19                         | 406                        | 78                         |
| Age group (years)               | 30 - 60                    | 30 - 60                    | 30 - 60                    | 30 - 60                    | 30 - 60                    | 30 - 60                    |
| Average age (years)             | 41.7 ± 9.1                 | 40.8 ± 8.9                 | 42.8 ± 9.0                 | 44.5 ± 8.8                 | 41.2 ± 9.1                 | 39.9 ± 8.8                 |
| Weight (kg)                     | 58.4 ± 11.2                | 59.1 ± 11.7                | 63.0 ± 10.0                | 63.3 ± 12.0                | 56.6 ± 11.2                | 58.0 ± 11.5                |
| Height (m)                      | 1.5 ± 0.2                  | 1.5 ± 0.1                  | 1.6 ± 0.1                  | 1.6 ± 0.1                  | 1.5 ± 0.2                  | 1.5 ± 0.1                  |
| BMI (kg/m <sup>2</sup> )        | 25.0 ± 4.5                 | 25.5 ± 4.6                 | 23.8 ± 3.6                 | 24.3 ± 4.8                 | 25.5 ± 4.8                 | 25.8 ± 4.5                 |
| Systolic blood pressure (mmHg)  | 129.7 ± 20.9               | 131.4 ± 19.4               | 130.5 ± 17.8               | 136.4 ± 14.4               | 129.3 ± 22.1               | 130.2 ± 20.4               |
| Diastolic blood pressure (mmHg) | 77.2 ± 12.5                | 76.0 ± 10.5                | 78.8 ± 12.4                | 81.1 ± 7.1                 | 76.6 ± 12.5                | 74.7 ± 10.9                |
| Creatinine (mg/dl)              | 0.8 ± 0.2                  | 0.8 ± 0.2                  | 0.9 ± 0.2                  | 0.8 ± 0.2                  | 0.8 ± 0.2                  | 0.8 ± 0.2                  |
| Cholesterol (mg/dl)             | 160.7 ± 25.2               | 158.4 ± 23.1               | 160.1 ± 26.9               | 161.4 ± 31.3               | 161.0 ± 24.5               | 157.7 ± 20.8               |
| HDL (mg/dl)                     | 37.8 ± 7.5                 | 38.4 ± 7.0                 | 37.7 ± 7.7                 | 35.2 ± 7.7                 | 37.9 ± 7.4                 | 39.2 ± 6.7                 |
| LDL (mg/dl)                     | 93.2 ± 20.8                | 89.7 ± 16.8                | 91.5 ± 23.0                | 97.2 ± 26.0                | 94.0 ± 19.9                | 87.9 ± 13.2                |
| Triglycerides (mg/dl)           | 150.0 ± 44.9               | 152.9 ± 45.3               | 152.5 ± 58.3               | 145.9 ± 26.5               | 149.0 ± 38.0               | 154.5 ± 48.7               |
| ALT (U/l)                       | 43.8 ± 13.1                | 46.7 ± 26.5                | 46.3 ± 14.8                | 53.3 ± 53.8                | 42.7 ± 12.2                | 45.2 ± 13.7                |
| FPG (mmol/l)                    | 4.4 ± 0.8<br>(79.2 ± 14.4) | 4.5 ± 0.8<br>(81.0 ± 14.4) | 4.4 ± 0.7<br>(79.2 ± 12.6) | 4.4 ± 0.9<br>(79.2 ± 16.2) | 4.3 ± 0.8<br>(77.4 ± 14.4) | 4.5 ± 0.8<br>(81.0 ± 14.4) |
| IAP (U/g stool)                 | 73.2 ± 91.5                | 56.9 ± 71.7                | 66.1 ± 92.1                | 32.9 ± 25.3                | 76.2 ± 91.2                | 62.4 ± 77.6                |

The participants of this prospective cohort study were selected from the non-diabetic healthy control group described in a previous study.<sup>7</sup> Because of migration, refusal, pregnancy or death some participants were excluded from the study (see Fig. 1). A comparison of the first visit physical and biochemical characteristics of included or excluded participants is provided. The data on 4 dead participants have been excluded from the analysis. Data values are summarized as mean (average) ± SD for each variable. The statistical significance of difference between two respective groups (Included and Excluded) was examined using the unpaired two-tailed Student's *t*-test.  $p < 0.05$  is considered significant. **Note:** The physical and biochemical parameters were similar between the respective included and excluded groups.

Malo et al., 2021

IAPD increases the risk of diabetes

**Table S2. The physical and biochemical characteristics of participants included in the 5-year prospective cohort study.**

| Characteristic           | Total participants         |                                | Males                      |                                | Females                    |                                |
|--------------------------|----------------------------|--------------------------------|----------------------------|--------------------------------|----------------------------|--------------------------------|
|                          | First visit                | Second visit                   | First visit                | Second visit                   | First visit                | Second visit                   |
| No. of participants      | 574                        | 574                            | 168                        | 168                            | 406                        | 406                            |
| Age group (years)        | 30 - 60                    | -                              | 30 - 60                    | -                              | 30 - 60                    | -                              |
| Average age (years)      | 41.7 ± 9.1                 | -                              | 42.8 ± 9.0                 | -                              | 41.2 ± 9.1                 | -                              |
| Weight (kg)              | 58.4 ± 11.2                | 59.8 ± 9.9*                    | 63.0 ± 10.0                | 63.3 ± 9.1                     | 56.6 ± 11.2                | 58.3 ± 9.9*                    |
| Height (m)               | 1.5 ± 0.2                  | -                              | 1.6 ± 0.1                  | -                              | 1.5 ± 0.2                  | -                              |
| BMI (kg/m <sup>2</sup> ) | 25.0 ± 4.5                 | 25.6 ± 4.4*                    | 23.8 ± 3.6                 | 24.1 ± 3.6                     | 25.5 ± 4.8                 | 26.3 ± 4.6*                    |
| Systolic BP (mmHg)       | 129.7 ± 20.9               | 130.4 ± 16.9                   | 130.5 ± 17.8               | 131.1 ± 14.6                   | 129.3 ± 22.1               | 130.0 ± 17.8                   |
| Diastolic BP (mmHg)      | 77.2 ± 12.5                | 79.8 ± 8.9                     | 78.8 ± 12.4                | 80.5 ± 8.4                     | 76.6 ± 12.5                | 79.5 ± 9.1                     |
| Creatinine (mg/dl)       | 0.8 ± 0.2                  | 0.9 ± 0.3***                   | 0.9 ± 0.2                  | 1.0 ± 0.3***                   | 0.8 ± 0.2                  | 0.9 ± 0.2***                   |
| Cholesterol (mg/dl)      | 160.7 ± 25.2               | 180.1 ± 34.1***                | 160.1 ± 26.9               | 174.0 ± 34.3***                | 161.0 ± 24.5               | 182.6 ± 33.7***                |
| HDL (mg/dl)              | 37.8 ± 7.5                 | 42.6 ± 8.7***                  | 37.7 ± 7.7                 | 40.8 ± 7.9***                  | 37.9 ± 7.4                 | 43.3 ± 8.9***                  |
| LDL (mg/dl)              | 93.2 ± 20.8                | 104.9 ± 28.6***                | 91.5 ± 23.0                | 99.9 ± 29.2**                  | 94.0 ± 19.9                | 107.0 ± 28.1***                |
| Triglycerides (mg/dl)    | 150.0 ± 44.9               | 162.1 ± 66.5***                | 152.5 ± 58.3               | 165.1 ± 69.5*                  | 149.0 ± 38.0               | 160.8 ± 65.2**                 |
| ALT (U/l)                | 43.8 ± 13.1                | 37.1 ± 18.1***                 | 46.3 ± 14.8                | 43.1 ± 17.8*                   | 42.7 ± 12.2                | 34.6 ± 17.6***                 |
| FPG (mmol/l)<br>(mg/dl)  | 4.4 ± 0.8<br>(79.2 ± 14.4) | 6.0 ± 1.9***<br>(108.0 ± 34.2) | 4.4 ± 0.7<br>(79.2 ± 12.6) | 5.8 ± 0.9***<br>(104.4 ± 16.2) | 4.3 ± 0.8<br>(77.4 ± 14.4) | 6.1 ± 2.2***<br>(109.8 ± 39.6) |
| IAP (U/g stool)          | 73.2 ± 91.5                | 70.4 ± 54.3                    | 66.1 ± 92.1                | 66.2 ± 44.5                    | 76.2 ± 91.2                | 72.1 ± 57.8                    |

Data values are summarized as mean (average) ± SD for each variable. The statistical significance of difference between two respective groups was determined using the paired two-tailed Student's *t*-test. \*,  $p < 0.05$ ; \*\*,  $p < 0.01$ ; \*\*\*,  $p < 0.001$ .

Malo et al., 2021

IAPD increases the risk of diabetes

**Table S3. Baseline distribution of potential confounding factors of participants grouped by the status of intestinal alkaline phosphatase deficiency (IAPD) from 2015 to 2020.**

| Baseline Characteristic                             | Persistent no IAPD                              | Incident IAPD                                | Persistent IAPD                           | Remittent IAPD                               |
|-----------------------------------------------------|-------------------------------------------------|----------------------------------------------|-------------------------------------------|----------------------------------------------|
| IAP level (U/g stool)<br>(for defining IAPD status) | Baseline: $\geq 65.0$<br>Follow-up: $\geq 65.0$ | Baseline: $\geq 65.0$<br>Follow-up: $< 65.0$ | Baseline: $< 65.0$<br>Follow-up: $< 65.0$ | Baseline: $< 65.0$<br>Follow-up: $\geq 65.0$ |
| No. of participants<br>(n = 574)                    | 125<br>Male:31; Female 94                       | 63<br>Male:16; Female 47                     | 266<br>Male:80; Female 186                | 120<br>Male:41; Female 79                    |
| Age group (years)                                   | 30 - 60                                         | 30 - 60                                      | 30 - 60                                   | 30 - 60                                      |
| Average age (years)                                 | 40.2 $\pm$ 8.9                                  | 42.1 $\pm$ 10.1                              | 43.2 $\pm$ 8.8**                          | 39.8 $\pm$ 9.1                               |
| Weight (kg)                                         | 59.3 $\pm$ 11.9                                 | 56.0 $\pm$ 10.6                              | 58.1 $\pm$ 10.6                           | 59.8 $\pm$ 12.2                              |
| Height (m)                                          | 1.5 $\pm$ 0.1                                   | 1.5 $\pm$ 0.2                                | 1.5 $\pm$ 0.2                             | 1.5 $\pm$ 0.2                                |
| BMI (kg/m <sup>2</sup> )                            | 25.4 $\pm$ 5.1                                  | 24.4 $\pm$ 4.2                               | 24.9 $\pm$ 4.1                            | 25.2 $\pm$ 4.9                               |
| Systolic BP (mmHg)                                  | 128.0 $\pm$ 20.9                                | 136.3 $\pm$ 26.9                             | 129.8 $\pm$ 19.7                          | 127.7 $\pm$ 19.7                             |
| Diastolic BP (mmHg)                                 | 76.4 $\pm$ 13.6                                 | 81.3 $\pm$ 15.4*                             | 76.9 $\pm$ 11.8                           | 76.6 $\pm$ 11.8                              |
| Creatinine (mg/dl)                                  | 0.77 $\pm$ 0.20                                 | 0.82 $\pm$ 0.22                              | 0.80 $\pm$ 0.18*                          | 0.81 $\pm$ 0.22                              |
| Cholesterol (mg/dl)                                 | 162.2 $\pm$ 26.1                                | 160.6 $\pm$ 32.9                             | 162.1 $\pm$ 24.9                          | 156.4 $\pm$ 19.5                             |
| HDL (mg/dl)                                         | 37.8 $\pm$ 7.1                                  | 37.3 $\pm$ 8.3                               | 38.5 $\pm$ 7.7                            | 36.7 $\pm$ 7.0                               |
| LDL (mg/dl)                                         | 93.7 $\pm$ 23.1                                 | 93.4 $\pm$ 24.9                              | 93.7 $\pm$ 20.4                           | 91.7 $\pm$ 16.8                              |
| Triglycerides (mg/dl)                               | 148.5 $\pm$ 50.1                                | 157.5 $\pm$ 50.5                             | 152.7 $\pm$ 45.6                          | 142.0 $\pm$ 31.7                             |
| ALT (U/l)                                           | 43.6 $\pm$ 13.4                                 | 42.8 $\pm$ 9.2                               | 44.2 $\pm$ 13.1                           | 43.5 $\pm$ 14.7                              |
| FPG (mmol/l)                                        | 4.3 $\pm$ 0.8                                   | 4.5 $\pm$ 0.8                                | 4.4 $\pm$ 0.8                             | 4.3 $\pm$ 0.7                                |

Data values are summarized as mean (average)  $\pm$  SD for each variable. The statistical significance of difference between two respective groups was examined using the unpaired two-tailed Student's *t*-test (Reference group: Persistent no IAPD). \*,  $p < 0.05$ ; \*\*,  $p < 0.01$ .

Malo et al., 2021

IAPD increases the risk of diabetes

**Table S4. Pearson's correlation coefficients between IAP level and different risk factors of T2DM.**

| Risk factors                   | ALL participants |          | Male     |          | Female   |          |
|--------------------------------|------------------|----------|----------|----------|----------|----------|
|                                | Healthy          | T2DM     | Healthy  | T2DM     | Healthy  | T2DM     |
| Age (year)                     | -0.10692         | -0.06351 | -0.18413 | 0.03667  | -0.07733 | -0.07966 |
| BMI (kg/m <sup>2</sup> )       | 0.09033          | 0.13732  | 0.09281  | 0.12749  | 0.07438  | 0.11775  |
| Creatinine (mg/dl)             | -0.07520         | -0.14441 | -0.09369 | -0.13514 | -0.05376 | -0.14011 |
| Cholesterol (mg/dl)            | 0.08481          | 0.04135  | -0.05258 | -0.42217 | 0.12494  | 0.16316  |
| HDL (mg/dl)                    | 0.12047          | -0.11407 | 0.14480  | -0.48713 | 0.10671  | -0.04188 |
| LDL (mg/dl)                    | 0.07580          | 0.00605  | -0.01547 | -0.28390 | 0.10035  | 0.07638  |
| Triglycerides (mg/dl)          | -0.02536         | 0.24158  | -0.15956 | -0.38766 | 0.04490  | 0.31354  |
| ALT (U/l)                      | -0.02509         | -0.01383 | -0.01193 | 0.05983  | -0.01697 | -0.00283 |
| FPG (mmol/l)                   | -0.06700         | 0.16712  | -0.11275 | -0.47673 | -0.04718 | 0.20493  |
| Systolic blood pressure(mmHg)  | -0.12104         | -0.00835 | -0.08053 | 0.01622  | -0.12916 | -0.01814 |
| Diastolic blood pressure(mmHg) | -0.03241         | 0.00119  | -0.02409 | 0.17715  | -0.03136 | -0.03988 |

A Pearson correlation coefficient close to +1 or -1 indicates that the two variables are highly correlated (positively or negatively, respectively). A correlation coefficient between 0 and +0.50 or between 0 and -0.50 was considered of having no correlation between the two variables.

Malo et al., 2021

IAPD increases the risk of diabetes

**Table S5. Repeated measure analysis shows that T2DM status is highly associated with intestinal alkaline phosphatase (IAP).**

| Source                 | DF | Type III SS | Mean Square | F Value | Pr > F |
|------------------------|----|-------------|-------------|---------|--------|
| T2DM status            | 1  | 77605.144   | 77605.144   | 11.13   | 0.0009 |
| SEX                    | 1  | 4061.209    | 4061.209    | 0.58    | 0.4458 |
| AGE                    | 1  | 4975.518    | 4975.518    | 0.71    | 0.3987 |
| BMI at Visit 1         | 1  | 619.880     | 619.880     | 0.09    | 0.7657 |
| BMI at Visit 2         | 1  | 709.754     | 709.754     | 0.10    | 0.7499 |
| CREATININE at Visit 1  | 1  | 15697.090   | 15697.090   | 2.25    | 0.1342 |
| CREATININE at Visit 2  | 1  | 3512.831    | 3512.831    | 0.50    | 0.4782 |
| CHOLESTEROL at Visit 1 | 1  | 9491.264    | 9491.264    | 1.36    | 0.2439 |
| CHOLESTEROL at Visit 2 | 1  | 16623.520   | 16623.520   | 2.38    | 0.1233 |
| HDL at Visit 1         | 1  | 2523.506    | 2523.506    | 0.36    | 0.5478 |
| HDL at Visit 2         | 1  | 29982.986   | 29982.986   | 4.30    | 0.0386 |
| LDL at Visit 1         | 1  | 22057.293   | 22057.293   | 3.16    | 0.0759 |
| LDL at Visit 2         | 1  | 17881.810   | 17881.810   | 2.56    | 0.1100 |
| TG at Visit 1          | 1  | 4775.418    | 4775.418    | 0.68    | 0.4084 |
| TG at Visit 2          | 1  | 25075.565   | 25075.565   | 3.60    | 0.0585 |
| SGPT at Visit 1        | 1  | 642.319     | 642.319     | 0.09    | 0.7617 |
| SGPT at Visit 2        | 1  | 10511.694   | 10511.694   | 1.51    | 0.2201 |
| SBP at Visit 1         | 1  | 3341.958    | 3341.958    | 0.48    | 0.4891 |
| SBP at Visit 2         | 1  | 2915.203    | 2915.203    | 0.42    | 0.5183 |
| DBP at Visit 1         | 1  | 23947.197   | 23947.197   | 3.43    | 0.0645 |
| DBP at Visit 2         | 1  | 56.761      | 56.761      | 0.01    | 0.9282 |

**Legend:** SBP, systolic blood pressure; DBP, diastolic blood pressure.



Malo et al., 2021

IAPD increases the risk of diabetes

**Table S6. The rate of increase of fasting plasma glucose (FPG) is not dependent on age.**

| Age group (years) | No. of participants | Percentage (%) of increase of FPG level |
|-------------------|---------------------|-----------------------------------------|
| 30 - 39           | 243                 | 35.6 ± 2.3 <sup>ns</sup>                |
| 40 - 49           | 177                 | 40.2 ± 3.0 <sup>ns</sup>                |
| 50 - 60           | 151                 | 36.7 ± 2.5 <sup>ns</sup>                |

Participants included were males and females having diabetes or no diabetes. The percentage of increase of FPG from first visit (baseline value) to second visit (follow-up value) during the 5-year period was calculated. Data values are summarized as mean (average) ± SEM. Statistical significance of the difference between two groups was tested using the paired two-tailed Student's *t*-test. ns, not significant.

Malo et al., 2021

IAPD increases the risk of diabetes

**REFERENCES**

1. American Diabetes Association (a). 2. Classification and Diagnosis of Diabetes: Standards of Medical Care in Diabetes-2018. *Diabetes Care* 2018;41(Suppl 1):S13-S27.
2. American Diabetes Association (b). Economic Costs of Diabetes in the U.S. in 2017. *Diabetes Care* 2018;41(5):917-28.
3. Saeedi P, Petersohn I, Salpea P, et al. Global and regional diabetes prevalence estimates for 2019 and projections for 2030 and 2045: Results from the International Diabetes Federation Diabetes Atlas, 9(th) edition. *Diabetes Res Clin Pract* 2019;157:107843.
4. Cho NH, Shaw JE, Karuranga S, et al. IDF Diabetes Atlas: Global estimates of diabetes prevalence for 2017 and projections for 2045. *Diabetes Res Clin Pract* 2018;138:271-81.
5. World Health Organization. Global health estimates: Diabetes: Key-Facts, 2020 (<https://www.who.int/news-room/fact-sheets/detail/diabetes>).
6. Centers for Disease Control and Prevention, US Department of Health and Human Services; 2020 (<https://www.cdc.gov/diabetes/data/statistics/statistics-report.html>).
7. Malo MS. A High Level of Intestinal Alkaline Phosphatase Is Protective Against Type 2 Diabetes Mellitus Irrespective of Obesity. *EBioMedicine* 2015;2(12):2016-23.
8. Rowley WR, Bezold C, Arikian Y, Byrne E, Krohe S. Diabetes 2030: Insights from Yesterday, Today, and Future Trends. *Popul Health Manag* 2017;20(1):6-12.
9. Aguilar D. Improving Outcomes in Patients With Diabetes Mellitus. *J Am Heart Assoc* 2019;8(4):e011971.
10. Eliakim R, Mahmood A, Alpers DH. Rat intestinal alkaline phosphatase secretion into lumen and serum is coordinately regulated. *Biochim Biophys Acta* 1991;1091(1):1-8.
11. Malo MS, Alam SN, Mostafa G, et al. Intestinal alkaline phosphatase preserves the normal homeostasis of gut microbiota. *Gut* 2010;59(11):1476-84.
12. Lalles JP. Intestinal alkaline phosphatase: novel functions and protective effects. *Nutr Rev* 2014;72(2):82-94.
13. Lalles JP. Recent advances in intestinal alkaline phosphatase, inflammation, and nutrition. *Nutr Rev* 2019;77(10):710-24.
14. Buchet R, Millan JL, Magne D. Multisystemic functions of alkaline phosphatases. *Methods Mol Biol* 2013;1053:27-51.
15. Fawley J, Gourlay DM. Intestinal alkaline phosphatase: a summary of its role in clinical disease. *J Surg Res* 2016;202(1):225-34.
16. Ghosh SS, Wang J, Yannie PJ, Ghosh S. Intestinal Barrier Dysfunction, LPS Translocation, and Disease Development. *J Endocr Soc* 2020;4(2):bvz039.
17. Bentala H, Verweij WR, Huizinga-Van der Vlag A, van Loenen-Weemaes AM, Meijer DK, Poelstra K. Removal of phosphate from lipid A as a strategy to detoxify lipopolysaccharide. *Shock* 2002;18(6):561-6.
18. Chen KT, Malo MS, Moss AK, et al. Identification of specific targets for the gut mucosal defense factor intestinal alkaline phosphatase. *Am J Physiol Gastrointest Liver Physiol* 2010;299(2):G467-75.

Malo et al., 2021

IAPD increases the risk of diabetes

19. Moss AK, Hamarneh SR, Mohamed MM, et al. Intestinal alkaline phosphatase inhibits the proinflammatory nucleotide uridine diphosphate. *Am J Physiol Gastrointest Liver Physiol* 2013;304(6):G597-604.
20. Hyoju SK, Morrison S, Gul S, et al. Intestinal alkaline phosphatase decreases intraperitoneal adhesion formation. *J Surg Res* 2017;208:84-92.
21. Poelstra K, Bakker WW, Klok PA, Hardonk MJ, Meijer DK. A physiologic function for alkaline phosphatase: endotoxin detoxification. *Lab Invest* 1997;76(3):319-27.
22. Malo MS, Moaven O, Muhammad N, et al. Intestinal alkaline phosphatase promotes gut bacterial growth by reducing the concentration of luminal nucleotide triphosphates. *Am J Physiol Gastrointest Liver Physiol* 2014;306(10):G826-38.
23. Liu W, Hu D, Huo H, et al. Intestinal Alkaline Phosphatase Regulates Tight Junction Protein Levels. *J Am Coll Surg* 2015;222(6):1009-17.
24. Mizumori M, Ham M, Guth PH, Engel E, et al. Intestinal alkaline phosphatase regulates protective surface microclimate pH in rat duodenum. *J Physiol*. 2009;587(14):3651-3663.
25. Narisawa S, Huang L, Iwasaki A, Hasegawa H, Alpers DH, Millan JL. Accelerated fat absorption in intestinal alkaline phosphatase knockout mice. *Mol Cell Biol* 2003;23(21):7525-30.
26. Kaliannan K, Hamarneh SR, Economopoulos KP, et al. Intestinal alkaline phosphatase prevents metabolic syndrome in mice. *Proc Natl Acad Sci U S A* 2013;110(17):7003-8.
27. Lukas M, Drastich P, Konecny M, et al. Exogenous alkaline phosphatase for the treatment of patients with moderate to severe ulcerative colitis. *Inflamm Bowel Dis* 2010;16(7):1180-6.
28. Ramasamy S, Nguyen DD, Eston MA, et al. Intestinal alkaline phosphatase has beneficial effects in mouse models of chronic colitis. *Inflamm Bowel Dis* 2011;17(2):532-42.
29. Whitehouse JS, Riggle KM, Purpi DP, et al. The protective role of intestinal alkaline phosphatase in necrotizing enterocolitis. *J Surg Res* 2010;163(1):79-85.
30. van Veen SQ, van Vliet AK, Wulferink M, Brands R, Boermeester MA, van Gulik TM. Bovine intestinal alkaline phosphatase attenuates the inflammatory response in secondary peritonitis in mice. *Infect Immun* 2005;73(7):4309-14.
31. Ebrahimi F, Malo MS, Alam SN, et al. Local peritoneal irrigation with intestinal alkaline phosphatase is protective against peritonitis in mice. *J Gastrointest Surg* 2011;15(5):860-9.
32. Pickkers P, Heemskerk S, Schouten J, et al. Alkaline phosphatase for treatment of sepsis-induced acute kidney injury: a prospective randomized double-blind placebo-controlled trial. *Crit Care* 2012;16(1):R14.
33. Alam SN, Yammine H, Moaven O, et al. Intestinal alkaline phosphatase prevents antibiotic-induced susceptibility to enteric pathogens. *Ann Surg* 2014;259(4):715-22.
34. Kuhn F, Adiliaghdam F, Cavallaro PM, et al. Intestinal alkaline phosphatase targets the gut barrier to prevent aging. *JCI Insight* 2020;5(6).
